# Supplementary material for: National evaluation of the benefits and risks of greater structuring and coding of the electronic health record: exploratory qualitative investigation
Source: PubMed Central journal article supplement — J Am Med Inform Assoc. 2013 Nov 1;21(3):492–500. doi: 10.1136/amiajnl-2013-001666 (PMC3994848; doi:10.1136/amiajnl-2013-001666), 2013-11-01
Supplement: amiajnl-2013-001666-s2.pdf [file amiajnl-2013-001666-s2.pdf]

## **Web Appendix 2: Sample Interview Topic Guide**

How do you currently perceive/produce/use/implement structured data in patient records?

How do you currently perceive/produce/use/implement coded data in patient records?

How much variation is observed in structuring and coding? What are the implications for data quality?

What determines the balance between free text and coding?

What are the perceived issues surrounding privacy and anonymisation of coded data?

What is your perception of how structured data is used, both by yourself, and by others?

What are your perceptions of the (*future*) use of structured and coded data?
