# Supplementary material for: National evaluation of the benefits and risks of greater structuring and coding of the electronic health record: exploratory qualitative investigation
Source: PubMed Central journal article supplement — J Am Med Inform Assoc. 2013 Nov 1;21(3):492–500. doi: 10.1136/amiajnl-2013-001666 (PMC3994848; doi:10.1136/amiajnl-2013-001666), 2013-11-01
Supplement: amiajnl-2013-001666-s4.pdf [file amiajnl-2013-001666-s4.pdf]

**Web Appendix 4: Expert discussion group topics and number of participants**

| <b>Group</b> | <b>Discussion topic</b>                                                                                                                                                                                                                 | <b>Number of participants</b> |
|--------------|-----------------------------------------------------------------------------------------------------------------------------------------------------------------------------------------------------------------------------------------|-------------------------------|
| 1            | Are there areas of clinical practice where structuring and coding could make an immediate and positive impact?                                                                                                                          | 7                             |
| 2            | How close are we to realising the potential of Natural Language Processing to supersede formal templates and terminologies?                                                                                                             | 9                             |
| 3            | Is it appropriate and useful to code a patient's clinical history?                                                                                                                                                                      | 7                             |
| 4            | Should patients be offered the facility to review and populate their own health records using structure templates and terminologies?                                                                                                    | 7                             |
| 5            | What do secondary use services (SUS) need from clinical coding? How does this complement and conflict with the needs of clinical care?                                                                                                  | 6                             |
| 6            | What should we do about data quality? This group will consider the problems of poorly coded data, the types of data that may be coded and for what purpose, educational needs to ensure accurate coding for both practice and research. | 7                             |
